# Supplementary material
Source: PubMed Central journal article supplement (PMC3791140)
Supplement: NIHMS514653-supplement-eTables_1-3.pdf [file NIHMS514653-supplement-eTables_1-3.pdf]

## Supplementary Online Content

Xing M, Alzahrani AS, Carson CA, et al. Association between *BRAF* V600E mutation and mortality in patients with papillary thyroid cancer. *JAMA*.  
doi:10.1001/jama.2013.3190

**eTable 1.** Radioiodine-131 Treatment Doses (mCi; median, interquartile range) by *BRAF* V600E Mutation Status and by Center and Country

**eTable 2.** Interactions of *BRAF* V600E With Conventional Risk Factors of Papillary Thyroid Cancer—Synergy Test

**eTable 3.** Papillary Thyroid Cancer (PTC)-Related Mortality and Relative Risks (RR) in *BRAF* V600E Mutation-Positive vs -Negative Patients in Various Clinicopathological Categories of Conventional PTC

This supplementary material has been provided by the authors to give readers additional information about their work.

**eTable 1.** Radioiodine-131 Treatment Doses (mCi; median, interquartile range) by *BRAF* V600E Mutation Status and by Center and Country

| Medical Center or Country |                                                      | Number of Patients | BRAF+         | BRAF-         | P value |
|---------------------------|------------------------------------------------------|--------------------|---------------|---------------|---------|
| Medical Center            | Johns Hopkins Hospital                               | 387                | 76 (0-100)    | 30 (0-100)    | 0.03    |
|                           | University of Pittsburgh                             | 162                | 135 (106-161) | 105 (0-134)   | <0.001  |
|                           | Memorial Sloan-Kettering Cancer Center               | 90                 | 104 (30-197)  | 75 (0-150)    | 0.05    |
|                           | University of Pisa                                   | 189                | 30 (30-30)    | 30 (30-30)    | 0.60    |
|                           | University of Perugia                                | 117                | 100 (50-100)  | 100 (50-100)  | 0.37    |
|                           | University of Milan                                  | 110                | 80 (50-80)    | 50 (0-80)     | 0.07    |
|                           | University of Padua                                  | 135                | 100 (100-150) | 100 (100-150) | 0.57    |
|                           | Kanagawa Cancer Center                               | 49                 | 0 (0-0)       | 0 (0-0)       | 1.0     |
|                           | MSC Memorial Cancer Centre and Institute of Oncology | 98                 | 100 (100-100) | 100 (100-100) | 0.84    |
|                           | Griffith Medical School                              | (76)               | -             | -             | -       |
|                           | University of Sydney                                 | 84                 | 143 (108-162) | 162 (135-270) | 0.26    |
|                           | Hospital La Paz, Health Research Institute (IdiPAZ)  | 66                 | 120 (100-150) | 100 (100-150) | 0.13    |
|                           | Institute of Endocrinology, Prague                   | 221                | 100 (0-102)   | 100 (0-119)   | 0.93    |
| Country                   | USA                                                  | 639                | 100 (0-137)   | 52 (0-103)    | <0.001  |
|                           | Italy                                                | 551                | 100 (30-100)  | 50 (30-100)   | <0.001  |
|                           | Japan                                                | 49                 | 0 (0-0)       | 0 (0-0)       | 1.0     |
|                           | Poland                                               | 98                 | 100 (100-100) | 100 (100-100) | 0.84    |
|                           | Australia                                            | 84                 | 143 (108-162) | 162 (135-270) | 0.26    |
|                           | Spain                                                | 66                 | 120 (100-150) | 100 (100-150) | 0.13    |
|                           | Czech Republic                                       | 221                | 100 (0-102)   | 100 (0-119)   | 0.93    |
| Overall                   | 1,708                                                | 100 (30-110)       | 80 (0-100)    | <0.001        |         |

**Notes:** Some of the total case numbers are smaller than those for the corresponding centers in Table 1 due to some cases missing the information on radioiodine treatment. None of the 76 patients from the Medical Center of Griffith Medical School in Australia had available information on radioiodine treatment. Overall, 92.4% (1,708/1,849) patients had information available on radioiodine treatment.

**eTable 2.** Interactions of *BRAF* V600E With Conventional Risk Factors of Papillary Thyroid Cancer—Synergy Test

| <b>Risk factor tested for interaction with <i>BRAF</i><sup>V600E</sup></b> | <b>Synergy Index</b> | <b>95% Confidence Interval</b> |
|----------------------------------------------------------------------------|----------------------|--------------------------------|
| Lymph node metastasis                                                      | 4.46                 | 1.76-11.32                     |
| Extrathyroidal invasion                                                    | 1.59                 | 0.84-3.02                      |
| Distant metastasis                                                         | 4.60                 | 1.90-11.14                     |
| Stage IV disease                                                           | 2.93                 | 1.39-6.19                      |
| Patient age $\geq$ 45 years                                                | 3.15                 | 1.37-7.27                      |
| Patient age $\geq$ 60 years                                                | 3.40                 | 1.52-7.62                      |

**Notes:** 1) A Synergy Index (SI) different than 1 is evidence of significant interaction. An SI > 1 is evidence of synergism and an SI < 1 is evidence of antagonism. All measures except for extrathyroidal extension show a statistically significant synergistic effect in an additive model. 2) Reference for the test method: Hosmer DW, Lemeshow S. Confidence interval estimation of interaction. *Epidemiology* 1992;3:452-6 (Ref #30 in the text).

**eTable 3.** Papillary Thyroid Cancer (PTC)-Related Mortality and Relative Risks (RR) in *BRAF* V600E Mutation-Positive vs -Negative Patients in Various Clinicopathological Categories of Conventional PTC

| Category                      | Mortality-Percent Rate |                |             | Person Years | Deaths per 1000 Person Years |                      |                     |                   |
|-------------------------------|------------------------|----------------|-------------|--------------|------------------------------|----------------------|---------------------|-------------------|
|                               | BRAF+, n/N (%)         | BRAF-, n/N (%) | P value     |              | BRAF+                        | BRAF-                | RR (95% CI)         |                   |
| All Conventional PTC patients | 33/659 (5.0)           | 6/574 (1.0)    | <0.001      | 5466.75      | 11.80 (8.39-16.60)           | 2.25 (1.01-5.00)     | 5.25 (2.20-12.54)   |                   |
| Age < 45 yrs                  | 5/280 (1.8)            | 0/308 (0)      | 0.02        | 2795.67      | 3.77 (1.57-9.06)             | 0                    | -                   |                   |
| Age ≥ 45 yrs                  | 28/379 (7.4)           | 6/266 (2.3)    | 0.004       | 2671.08      | 19.04 (13.15-27.58)          | 5.00 (2.25-11.12)    | 3.81 (1.58-9.20)    |                   |
| Age < 60 yrs                  | 12/483 (2.5)           | 1/469 (0.2)    | 0.003       | 4439.25      | 5.54 (3.15-9.76)             | 0.44 (0.06-3.12)     | 12.61 (1.64-97.01)  |                   |
| Age ≥ 60 yrs                  | 21/176 (11.9)          | 5/105 (4.8)    | 0.06        | 1027.50      | 33.22 (21.66-50.96)          | 12.64 (5.26-30.38)   | 2.63 (0.99-6.97)    |                   |
| Lymph node metastasis         | No                     | 2/326 (0.6)    | 2/337 (0.6) | 1.0          | 2862.33                      | 1.56 (0.39-6.25)     | 1.26 (0.32-5.05)    | 1.24 (0.17-8.78)  |
|                               | Yes                    | 29/277 (10.5)  | 4/204 (2.0) | <0.001       | 2181.42                      | 22.96 (15.96-33.04)  | 4.35 (1.63-11.60)   | 5.27 (1.85-15.00) |
| Extrathyroidal invasion       | No                     | 8/402 (2.0)    | 1/424 (0.2) | 0.02         | 3983.33                      | 4.25 (2.13-8.51)     | 0.48 (0.07-3.38)    | 8.94 (1.12-71.50) |
|                               | Yes                    | 24/250 (9.6)   | 5/144 (3.5) | 0.03         | 1449.33                      | 26.59 (17.82-39.67)  | 9.15 (3.81-21.97)   | 2.91 (1.11-7.62)  |
| Distant metastasis            | No                     | 9/607 (1.5)    | 2/548 (0.4) | 0.07         | 5041.92                      | 3.61 (1.88-6.94)     | 0.78 (0.20-3.14)    | 4.60 (0.99-21.29) |
|                               | Yes                    | 24/49 (49.0)   | 4/21 (19.0) | 0.03         | 415.08                       | 79.27 (53.13-118.27) | 35.61 (13.36-94.88) | 2.23 (0.77-6.42)  |
| Multifocality                 | No                     | 21/383 (5.5)   | 5/358 (1.4) | 0.002        | 3423.00                      | 12.42 (8.10-19.05)   | 2.89 (1.20-6.93)    | 4.31 (1.62-11.42) |
|                               | Yes                    | 11/272 (4.0)   | 1/208 (0.5) | 0.02         | 1971.92                      | 10.05 (5.56-18.14)   | 1.14 (0.16-8.10)    | 8.81 (1.14-68.24) |
| Stage IV disease              | No                     | 4/550 (0.7)    | 0/508 (0)   | 0.13         | 4695.92                      | 1.72 (0.65-4.58)     | 0                   | -                 |
|                               | Yes                    | 28/92 (30.4)   | 6/48 (12.5) | 0.02         | 611.92                       | 68.33 (47.18-98.97)  | 29.68 (13.33-66.06) | 2.30 (0.95-5.56)  |
| Stage I                       | 1/361 (0.3)            | 0/400 (0)      | 0.47        | 3476.92      | 0.62 (0.09-4.42)             | 0                    | -                   |                   |
| Stage II                      | 0/55 (0)               | 0/49 (0)       | -           | 462.25       | 0                            | 0                    | -                   |                   |
| Stage III                     | 3/134 (2.2)            | 0/59 (0)       | 0.55        | 756.75       | 5.77 (1.86-18.88)            | 0                    | -                   |                   |
| Tumor ≤1.0 cm                 | 2/136 (1.5)            | 0/201 (0)      | 0.16        | 1397.50      | 3.94 (0.99-15.75)            | 0                    | -                   |                   |
| Tumor 1.0- 2.0 cm             | 4/319 (1.2)            | 2/251 (0.8)    | 0.70        | 2619.25      | 2.95 (1.11-7.86)             | 1.58 (0.40-6.33)     | 1.86 (0.34-10.18)   |                   |
| Tumor 2.0-3.0 cm              | 12/183 (6.6)           | 1/116 (0.9)    | 0.02        | 1416.17      | 15.48 (8.79-27.25)           | 1.56 (0.22-11.08)    | 9.92 (1.29-76.26)   |                   |
| Tumor 3.0-4.0 cm              | 8/89 (9.0)             | 1/57 (1.8)     | 0.09        | 682.92       | 21.41 (10.71-42.82)          | 3.23 (0.46-22.95)    | 6.62 (0.83-52.96)   |                   |
| Tumor ≥ 4.0 cm                | 6/66 (9.1)             | 2/60 (3.3)     | 0.28        | 642.17       | 18.62 (8.37-41.46)           | 6.25 (1.56-24.99)    | 2.98 (0.60-14.76)   |                   |
